# Supplementary material for: Development of a core outcome set for studies involving patients undergoing major lower limb amputation for peripheral arterial disease: study protocol for a systematic review and identification of a core outcome set using a Delphi survey
Source: Trials. 2017 Dec 28;18:628. doi: 10.1186/s13063-017-2358-9 (PMC5747272; doi:10.1186/s13063-017-2358-9)
Supplement: Supplementary file 1 — Appendix A Search Details. (DOCX 85 kb) [file 13063_2017_2358_MOESM1_ESM.docx]

# Appendix A – Search Details

Below is the list of MeSH terms used for searching MEDLINE and EMBASE. This search was performed via Ovid using the following search criteria on 13th March 2017 and the numbers of results for each item are given.

| **#** | **Search item** | **Number of results** |
| --- | --- | --- |
| 1 | exp Peripheral Vascular Diseases/di [Diagnosis] | 218253 |
| 2 | Arterial Occlusive Diseases/di [Diagnosis] | 6766 |
| 3 | exp Arteriosclerosis/di [Diagnosis] | 35693 |
| 4 | exp Atherosclerosis/di [Diagnosis] | 18165 |
| 5 | exp Peripheral Arterial Disease/di [Diagnosis] | 22699 |
| 6 | (atherosclero* or arteriosclero* or PVD or PAOD or PAD).ti,ab. | 385166 |
| 7 | (arter$ adj4 ($occlus$ or steno$ or obstruct$ or lesio$ or block$ or obliter$)).ti,ab. | 233846 |
| 8 | (vascular adj4 (occlus* or steno* or obstruct* or lesio* or block* or obliter*)).ti,ab. | 62629 |
| 9 | (vein* adj4 (occlus* or steno* or obstruct* or lesio* or block* or obliter*)).ti,ab. | 30643 |
| 10 | (veno* adj4 (occlus* or steno* or obstruct* or lesio* or block* or obliter*)).ti,ab. | 34079 |
| 11 | (peripher* adj4 (occlus* or steno* or obstruct* or lesio* or block* or obliter*)).ti,ab. | 39183 |
| 12 | (peripheral adj3 dis*).ti,ab. | 85949 |
| 13 | arteriopathic.ti,ab. | 462 |
| 14 | CLI.ti,ab. | 4890 |
| 15 | dysvascular*.ti,ab. | 405 |
| 16 | (leg adj4 (obstruct* or occlus* or steno* or block* or obliter*)).ti,ab. | 1394 |
| 17 | (limb adj4 (obstruct* or occlus* or steno* or block* or obliter*)).ti,ab. | 4192 |
| 18 | (lower adj3 extrem* adj4 (obstruct* or occlus* or steno* or block* or obliter*)).ti,ab. | 3557 |
| 19 | 1-18 combined with OR | 966305 |
| 20 | amputee$.tw. | 11024 |
| 21 | Amputees/ | 44444 |
| 22 | (knee adj3 (disarticulat$ or exarticulat$)).tw. | 538 |
| 23 | (amputat$ adj3 (transfemoral or transtibial or lower limb or lower extremity or above knee or below knee or through knee)).tw. | 11473 |
| 24 | Disarticulation/ | 446 |
| 25 | Amputation/ | 50788 |
| 26 | 20-25 combined with OR | 100428 |
| 27 | (transfemoral or transtibial or lower limb or lower extremity or knee).tw. | 359281 |
| 28 | exp Leg/ | 391890 |
| 29 | 27 OR 28 | 610534 |
| 30 | 26 AND 29 | 28531 |
| 31 | 19 AND 30 | 5849 |
| 32 | Remove duplicates from 31 | 4288 |
